# Supplementary material for: Comprehensive Analysis of Differentially Expressed miRNAs and mRNAs Reveals That miR-181a-5p Plays a Key Role in Diabetic Dermal Fibroblasts
Source: J Diabetes Res. 2020 Oct 8;2020:4581954. doi: 10.1155/2020/4581954 (PMC7568154; doi:10.1155/2020/4581954)
Supplement: Supplementary Materials — The primer sequences used in our study are provided (see “Primer Sequences-Supplementary Table”). [file 4581954.f1.xlsx]

## Sheet: Sheet1
Primer	Primer Sequence (5’-3’)	Amplified Fragment Length (bp)
miR-181a-5p	Stem-loop primer：GTCGTATCCAGTGCAGGGTCCGAGGTATTCGCACTGGATACGACACTCAC	50
	Forward primer：CGAACATTCAACGCTGTCG
	Reverse primer：AGTGCAGGGTCCGAGGTATT
miR-143-3p	Stem-loop primer：GTCGTATCCAGTGCAGGGTCCGAGGTATTCGCACTGGATACGACGAGCTA	50
	Forward primer：CGCGTGAGATGAAGCACTG
	Reverse primer：AGTGCAGGGTCCGAGGTATT
miR-21-5p	Stem-loop primer：GTCGTATCCAGTGCAGGGTCCGAGGTATTCGCACTGGATACGACTCAACA	50
	Forward primer：GCGCGTAGCTTATCAGACTGA
	Reverse primer：AGTGCAGGGTCCGAGGTATT
POSTN	Forward primer：TTGATGGAGTGCCTGTGGAA	228
	Reverse primer：GTGTGTCTCCCTGAAGCAGT
CDH11	Forward primer：GTTGTTGTCTGTCTGCTGCTTTTA	143
	Reverse primer：ATGTGTGTGAAGAGAAGCCAGG
U6	Forward primer：CTCGCTTCGGCAGCACA	94
	Reverse primer：AACGCTTCACGAATTTGCGT
GAPDH	Forward primer：ACTCCTCCACCTTTGACGCT	187
	Reverse primer：GGTCTCTCTCTTCCTCTTGTGC
